# Supplementary material for: Sudden large-volume detachments of low-angle mountain glaciers – more frequent than thought?
Source: Copernicus journal article supplement (doi:10.5194/tc-15-1751-2021), 2021-04-12
Supplement: Supplementary file 1 [file tc-15-1751-2021-supplement.zip]

Archive with 3 entries (3 files):
- tc-15-1751-2021-supplement-title-page.pdf
- glacier_detachments.kmz
- supplement.pdf
