# Supplementary material for: Sudden large-volume detachments of low-angle mountain glaciers – more frequent than thought?
Source: Copernicus journal article supplement (doi:10.5194/tc-15-1751-2021), 2021-04-12
Supplement: Supplementary file 1 [file tc-15-1751-2021-supplement.zip › supplement.pdf]

**Table S1: Existing literature for the low-angle glacier detachment events and summary remarks where and how the present study extends existing knowledge.**

| Name of event | Literature                                                                                                                                                                                                                                                                                             | Contribution from the present work                                                                                                                                                                                    | Section |
|---------------|--------------------------------------------------------------------------------------------------------------------------------------------------------------------------------------------------------------------------------------------------------------------------------------------------------|-----------------------------------------------------------------------------------------------------------------------------------------------------------------------------------------------------------------------|---------|
| Devdorak      | Reineggs, 1796; Viskovatov, 1864; Statkowski, 1877, 1879; Stebnitsky, 1877; Khatisyan, 1889; Zaporozhchenko, Chernomorets, 2004; Petrakov et al., 2008; Chernomorets, 2014; Tavasiev, Galushkin, 2014; Dokukin et al., 2015; Asoyan, Rototaeva, 2016; Chernomorets et al., 2016; Tielidze et al., 2019 | Compilation of referenced work and interpretation with respect to glacier detachments in general. Existing work supplemented by own satellite observations, development after 2014, slopes and permafrost conditions. | 3.1.1   |
| Kolka         | Haeberli et al., 2004; Kotlyakov et al., 2004; Huggel et al., 2005; Drobyshev, 2006; Evans et al., 2009b                                                                                                                                                                                               | Compilation and interpretation of existing work; glacier slope and permafrost information added; interpretation modified                                                                                              | 3.1.2   |
| Rasht         | Dokukin et al. 2019                                                                                                                                                                                                                                                                                    | Many new observations added to the short descriptions available in literature, and discussion with respect to glacier detachments in general                                                                          | 3.2     |
| Aru           | Tian et al., 2017; Kääb et al., 2018; Gilbert et al., 2018                                                                                                                                                                                                                                             | Summary of existing work and discussion with respect to glacier detachments in general                                                                                                                                | 3.3     |
| Tsambagarav   | Avdeev et al., 1989                                                                                                                                                                                                                                                                                    | Summary of existing work, some own analyses, and discussion with respect to glacier detachments                                                                                                                       | 3.4     |
| Amney Machen  | Paul, 2019                                                                                                                                                                                                                                                                                             | Most information based on literature, but the 2019 event was added, some date estimates improved, permafrost information added, and interpretations modified.                                                         | 3.5     |
| Sedongpu      | Tong et al., 2018; Liu et al., 2019; Chen et al., 2020                                                                                                                                                                                                                                                 | Mainly own observations and conclusions, compared to list of events available in literature (focus in literature is on river damming), and discussion with respect to glacier detachments in general                  | 3.6.1-2 |
| Zelunglung    | Zhang, 1992                                                                                                                                                                                                                                                                                            | Summary of existing work, some own analyses, and discussion with respect to glacier detachments                                                                                                                       | 3.6.3   |
| Flat Creek    | Jacquemart et al., 2020; Jacquemart and Loso, 2019                                                                                                                                                                                                                                                     | Volume estimation and elevation differences for the 2016 event are new, otherwise mainly summary of existing work and discussion with respect to glacier detachments in general.                                      | 3.7     |
| Aparejo       | Ugalde et al., 2015; Ugalde, 2016; Ugalde et al., 2017; Marangunic, 1980                                                                                                                                                                                                                               | Mainly summary of existing work                                                                                                                                                                                       | 3.8     |
| Leñas         | Falaschi et al., 2019                                                                                                                                                                                                                                                                                  | Mainly summary of existing work and discussion with respect to glacier detachments in general                                                                                                                         | 3.9     |
| Tinguiririca  | Iribarren Anacona et al., 2015                                                                                                                                                                                                                                                                         | Many new observations and interpretations added to existing short description in literature, and discussion with respect to glacier detachments in general                                                            | 3.10.1  |

## Supplementary Figures

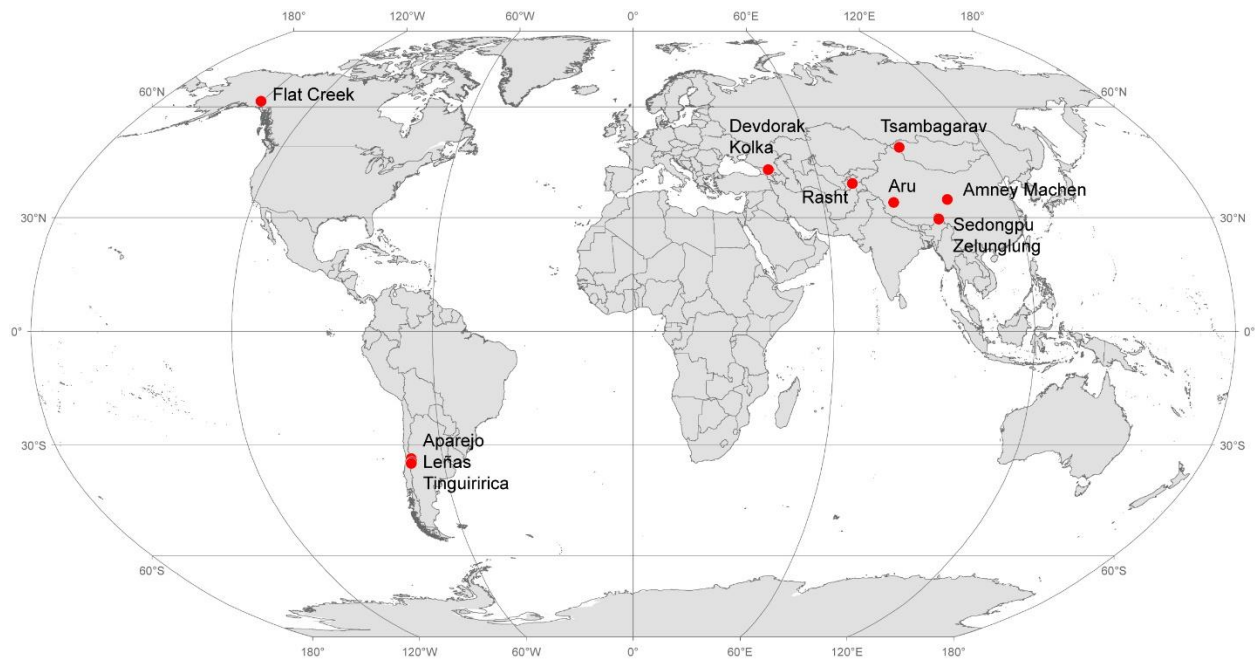

**Fig. S1: Location of low-angle glacier detachments discussed in this contribution. See also separate Google Earth kmz-file in the Supplement.**

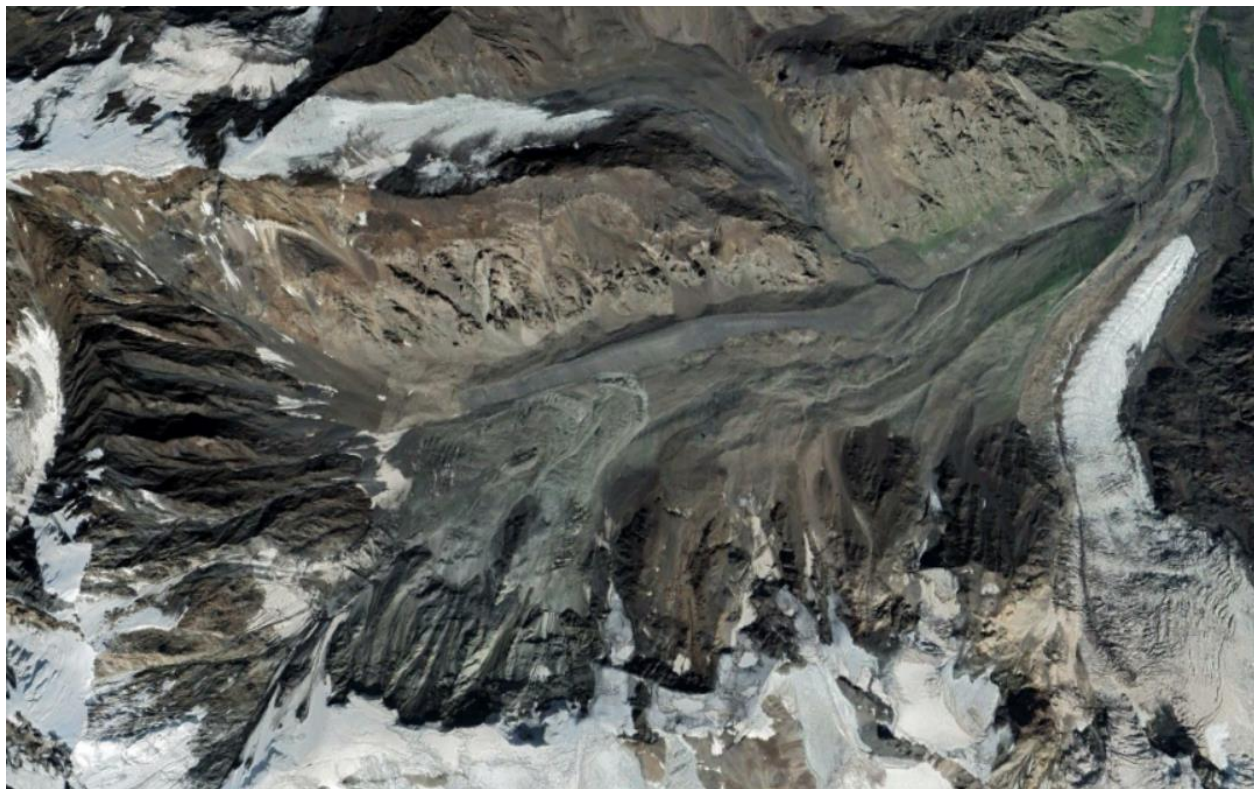

**Fig. S2: Situation of Kolka Glacier, 19 Aug 2019 (© GoogleEarth, CNES/Airbus). Width of section: 6 km. North to the top.**

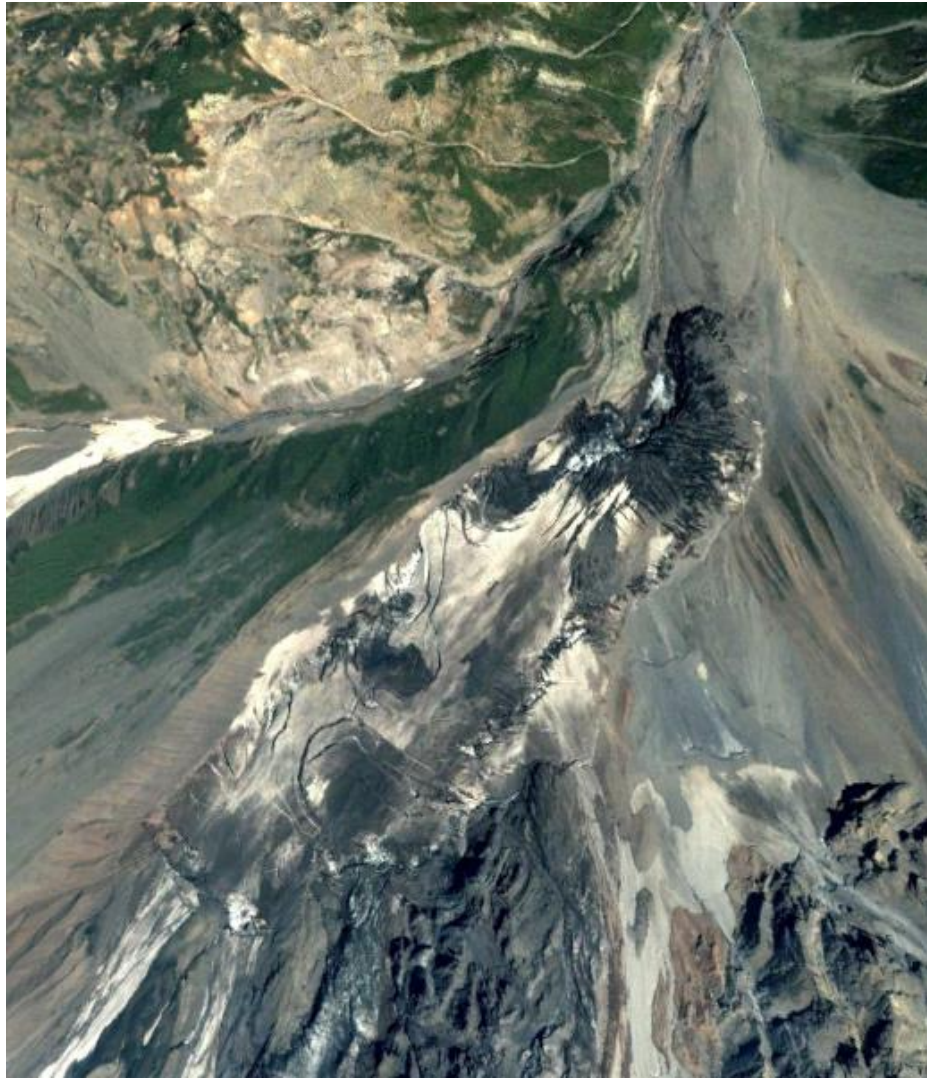

**Fig. S3: Rasht valley glacier that detached in 2019 on 30 Jul 2007 (© GoogleEarth, Maxar). The heavy crevassing did not lead to a detachment. Width of section: 1.3 km. North to the top.**

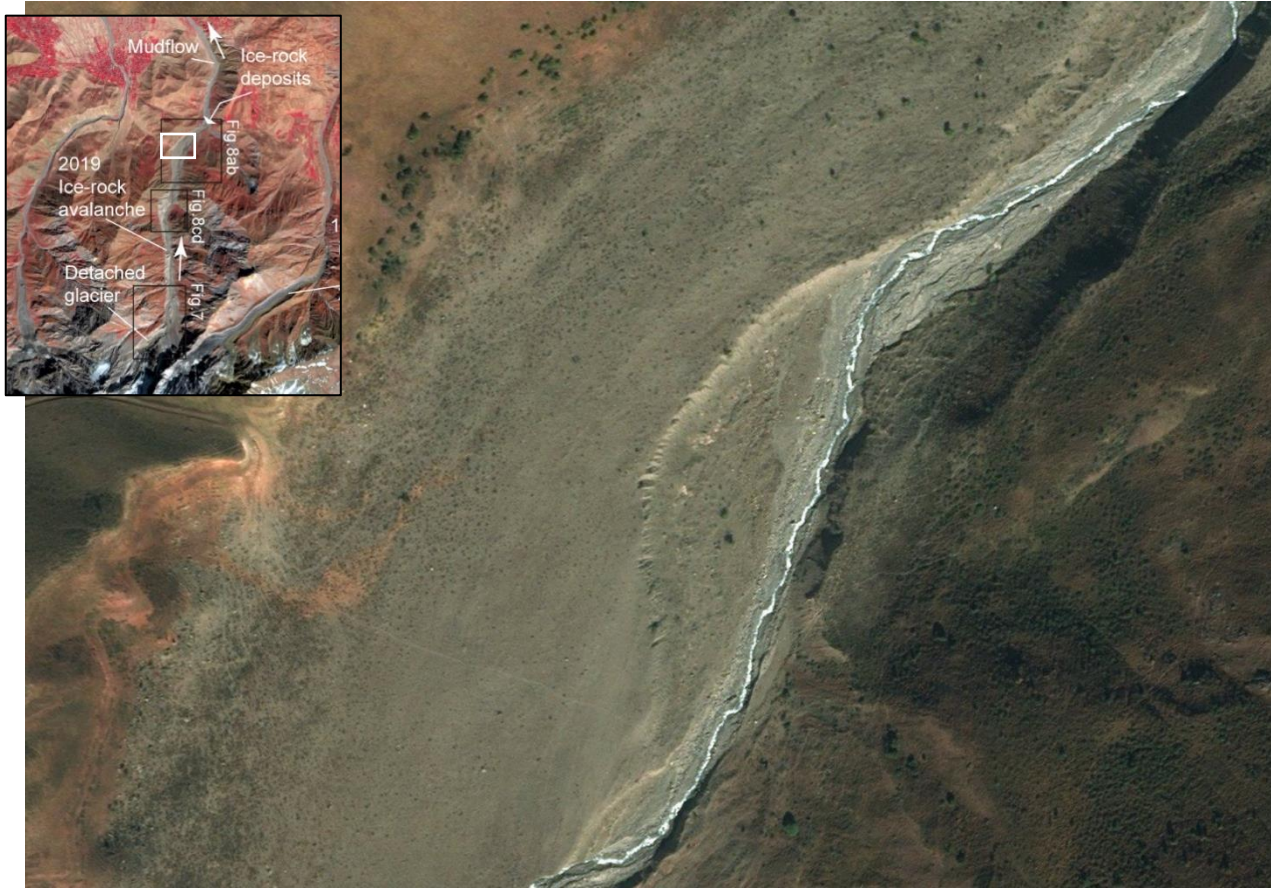

**Fig. S4: Later deposit area of the Rasht 2019 detachment showing features of a potential earlier ice-rock avalanche (streamlined features to the middle and lower part; rough chaotic microtopography to the upper right). (© GoogleEarth, Maxar). Width of section: 0.7 km. North to the top. Position of image section indicated as white rectangle in the upper left inset.**

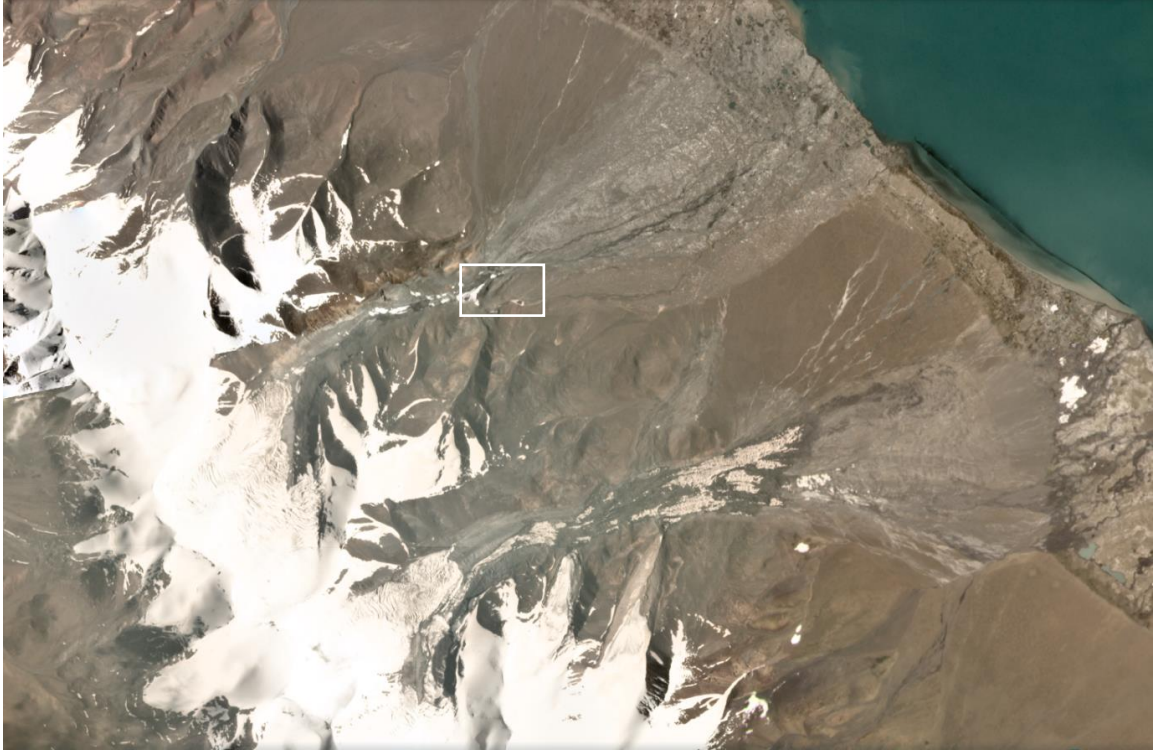

**Fig. S5: Situation of the two Aru glaciers in July 2020 (© Planet). North to the top. White rectangle indicates position of Fig. S6.**

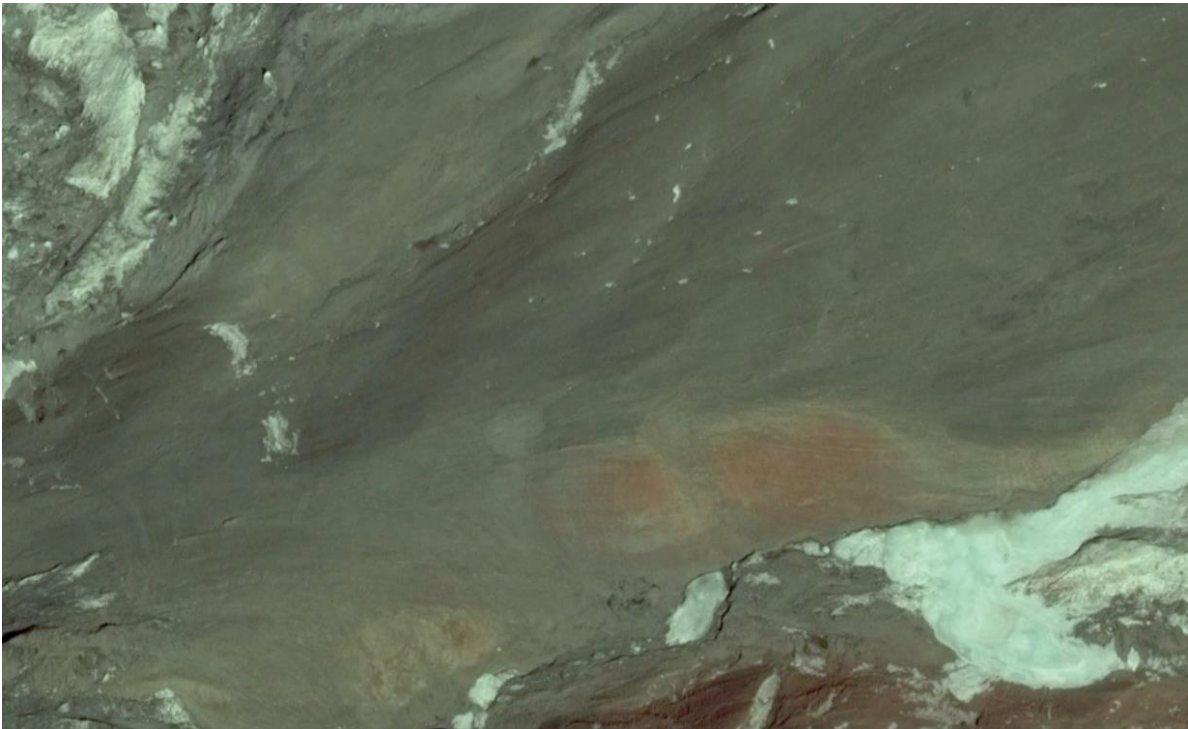

**Fig. S6: Debris stripes in the path of the Aru-1 avalanche. 27 Feb 2017 (© GoogleEarth, Maxar). Avalanche path was from left to right. Width of section: 0.46 km. North to the top. For position of figure see Fig. S5.**

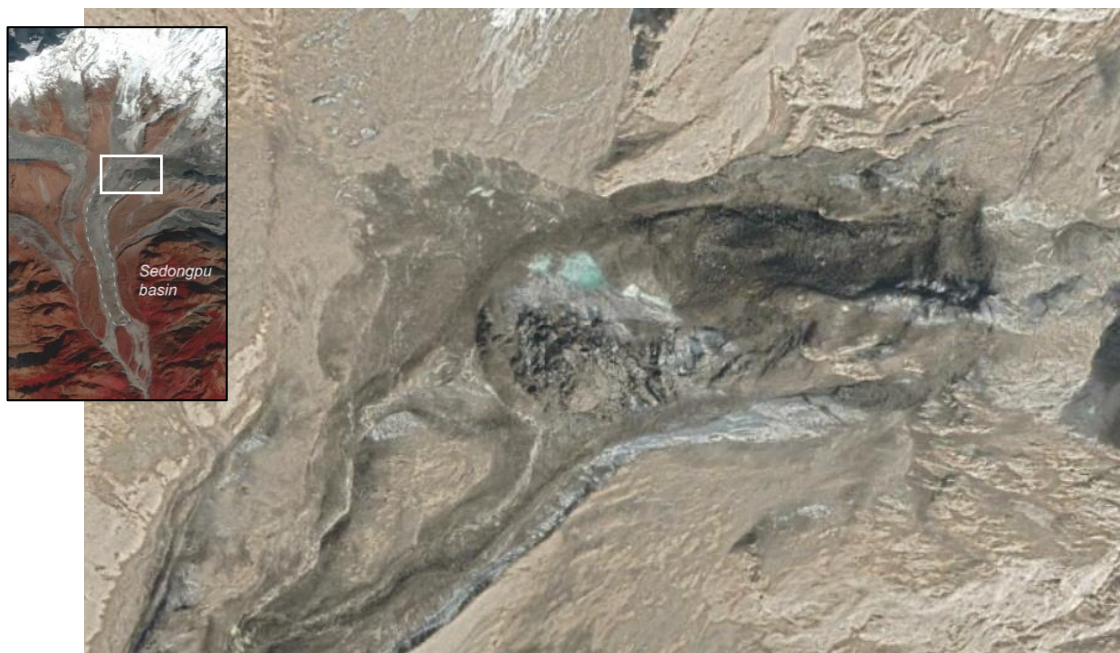

**Fig. S7: Detail of Sedonpgu Glacier at the foot of the Gyalha Peri rock wall with heavy crevassing, bulging, and lake formation; 4 Dec 2017 (© GoogleEarth, Maxar). Width of section: 1.8 km. North to the top. White rectangle in upper left inset indicates position of the figure.**

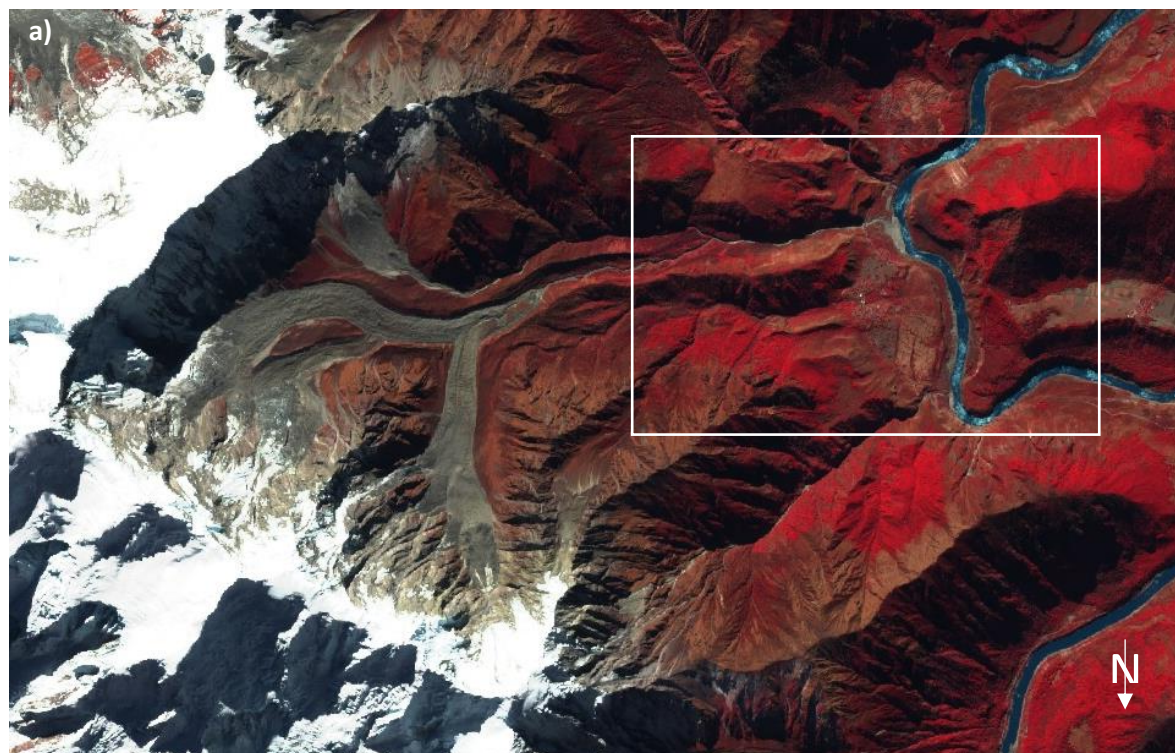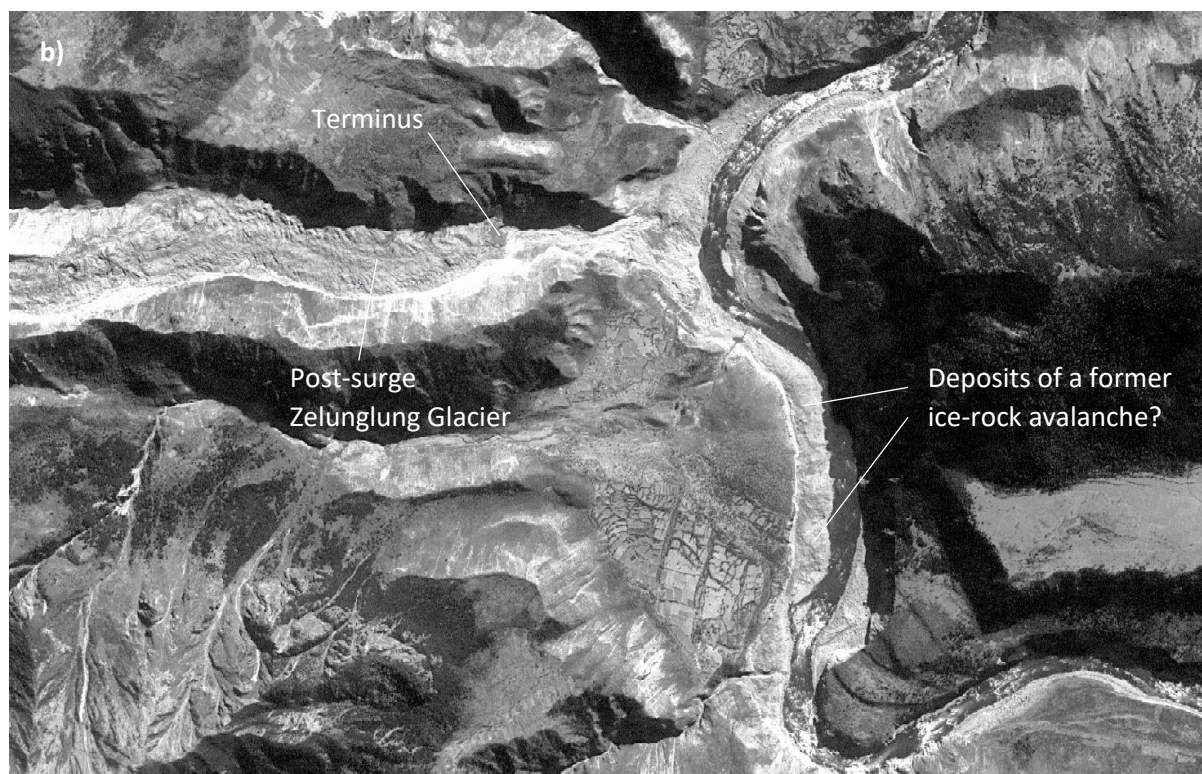

**Fig. S8: Zelunglung Glacier, south-eastern Tibet. (a) Sentinel-2 image (2021, Copernicus) with position of panel b). (b) Corona image of 1969 over Zelunglung Glacier (credit: USGS). South to the top. Width of section b): 5.5 km.**

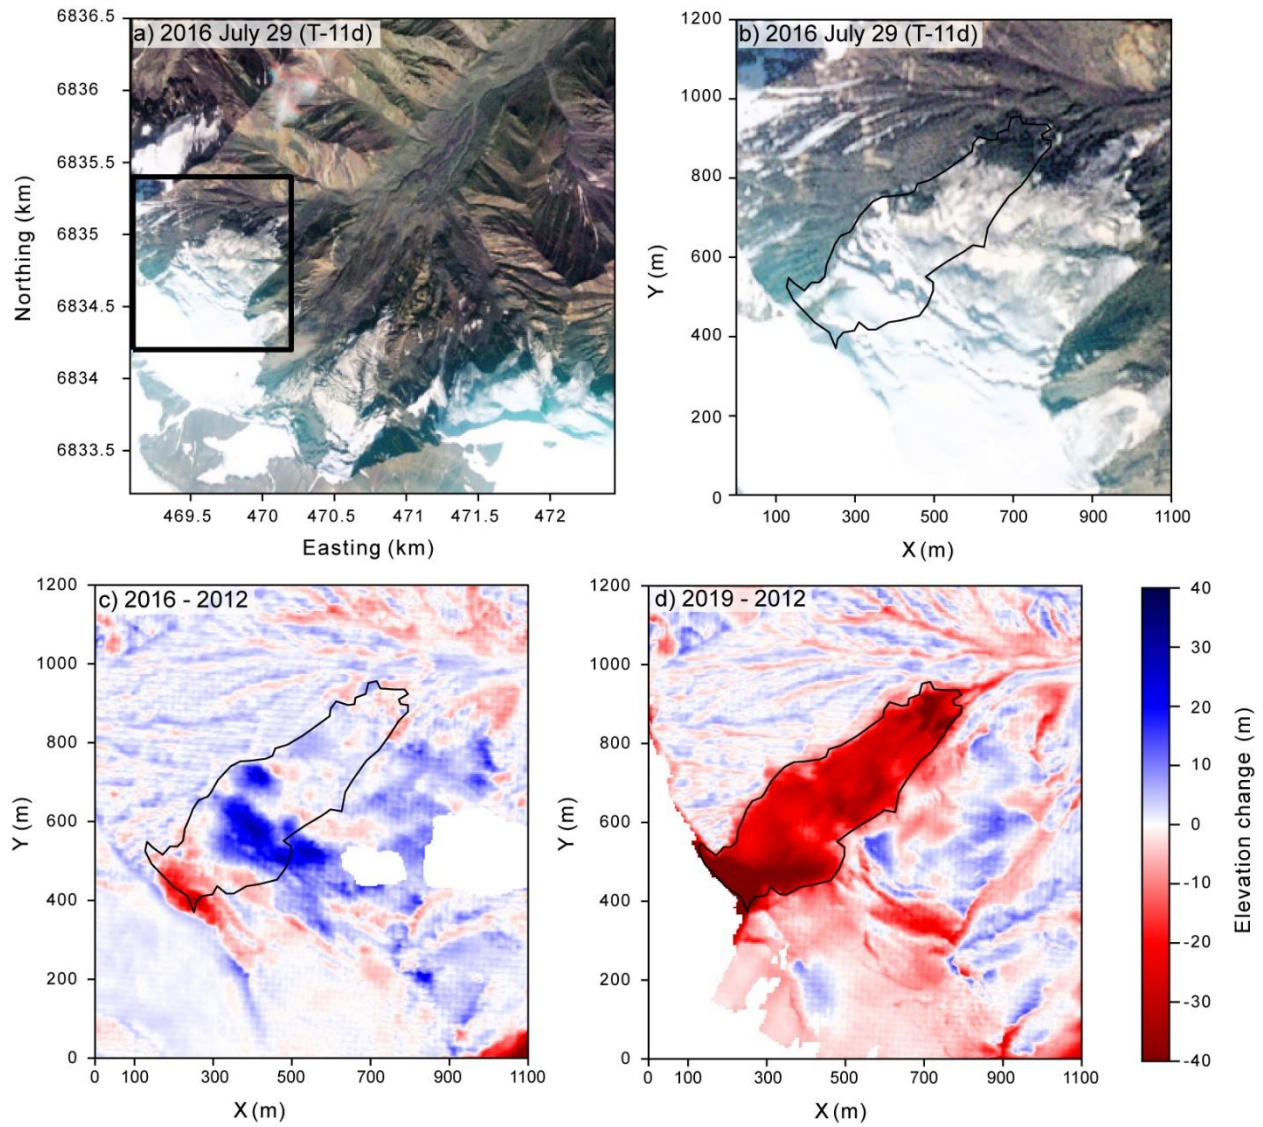

**Fig. S9:** a & b) Flat Creek cirque a few days before the 2016 detachment, image from Planet Labs. The black box indicates the area shown in panels b-d). c) DEM difference between 2016-03-13 (Arctic DEM) and summer 2012 (Alaska IfSAR). d) DEM difference between 2019-08-30 (structure-from-motion aerial DEM) and 2016-03-13 (Arctic DEM). Panel a) is in UTM Zone 7 N, panels b-d) are plotted in meters from the bottom left corner of the zoomed in area.

## Supplementary References

(in addition to those already contained in the reference list of the main article)

- Asoyan, D. S., and Rototaeva, O. V. Devdoraki Glacier, Kazbek: history of studies of natural hazards in XIX and the beginning of XXI centuries. *Led i Sneg. Ice and Snow*, 56(2): 253-264, <https://doi.org/10.15356/2076-6734-2016-2-253-264>, 2016.
- Dokukin, M. D., Savernyuk, E. A., and Chernomorets, S. S. Rock avalanches in the alpine zone of the Caucasus in the 21 century. *Priroda*, 7: 52-62, (in Russian), 2015.
- Khatisyan, G. S. The Kazbek glaciers in the period from 1862 to 1887. *Izvestiya Imperatorskago Russkago Geograficheskago Obschestva* 24(5): 326-347 (in Russian), 1889.
- Reineggs, J. Allgemeine historisch- topographische Beschreibung des Kaukasus (in German). - Gotha; St. Petersburg, Bd. 1, 296 S., <http://elibrary.shpl.ru/ru/nodes/24706-bd-1-1796>, 1796.
- Statkowski, B. I. Origin of repeating Kazbek blockage and measures for its prevention. Tiflis (in Russian), 1877.
- Statkowski, B. Problèmes de la Climatologie du Caucase. Paris, Gauthier-Villars, Imprimeur-Librairie. Successeur de Mallet-Bachelier. 279 p. <https://gallica.bnf.fr/ark:/12148/bpt6k9643218p.texteImage>, 1879.
- Stebnitsky, I. I. On the distribution of glaciers in the Caucasus. – *Izvestiya Kavkazskogo otdela Imperatorskago Russkago Geograficheskago Obschestva*, V(1): 1-21 (in Russian), 1877.
- Tavasiev, R. A., and Galushkin, I. V. Rock-ice collapse of Kazbek Mountain dated May 17, 2014. *Vestnik Vladikavkaz Scientific Center*, 14(2): 43-45, 2014.
- Tielidze, L. G., Kumladze, R. M., Wheate, R. D., and Gamkrelidze, M. The Devdoraki glacier catastrophes, Georgian Caucasus. *Hungarian Geographical Bulletin*, 68(1), 21-35, <https://doi.org/10.15201/hungeobull.68.1.2>, 2019.
- Viskovatov, A. A. About periodic Kazbek blockage. *Zapiski Kavkazskago otdela Imperatorskago Russkago geograficheskago obshestva* 6: 186-219. Tiflis (in Russian), 1864.
