# Supplementary material for: Sudden large-volume detachments of low-angle mountain glaciers – more frequent than thought?
Source: Copernicus journal article supplement (doi:10.5194/tc-15-1751-2021), 2021-04-12
Supplement: Supplementary file 1 [file tc-15-1751-2021-supplement.zip › tc-15-1751-2021-supplement-title-page.pdf]

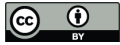

## *Supplement of*

# **Sudden large-volume detachments of low-angle mountain glaciers – more frequent than thought?**

**Andreas Kääb et al.**

*Correspondence to:* Andreas Kääb ([kaeab@geo.uio.no](mailto:kaeab@geo.uio.no))

- [tc-15-1751-2021-supplement-title-page.pdf](#)
- [glacier\\_detachments.kmz](#)
- [supplement.pdf](#)

The copyright of individual parts of the supplement might differ from the article licence.
